1

## 2 **Ovarian cancers with low CIP2A tumor expression constitute an** 3 **APR-246 sensitive disease subtype**

4

5 Anna N. Cvriljevic<sup>1</sup>, Umar Butt<sup>1,2</sup>, Kaisa Huhtinen<sup>2</sup>, Tove J. Grönroos<sup>3,4</sup>, Camilla  
6 Böckelman<sup>5,6</sup>, Heini Lassus<sup>7</sup>, Katja Kaipio<sup>2</sup>, Tiina Arsiola<sup>1</sup>, Teemu D. Laajala<sup>8</sup>, Denise C.  
7 Connolly<sup>9</sup>, Ari Ristimäki<sup>10,11</sup>, Olli Carpen<sup>2</sup>, Jeroen Pouwels<sup>1</sup>, Jukka Westermarck<sup>1,2</sup>

8

9 <sup>1</sup>Turku Bioscience Centre, University of Turku and Åbo Akademi University, Turku, Finland

10 <sup>2</sup>Institute of Biomedicine, University of Turku, Turku, Finland

11 <sup>3</sup>Turku PET Centre, University of Turku, Turku, Finland

12 <sup>4</sup>MediCity Research Laboratory, University of Turku, Turku, Finland

13 <sup>5</sup>Research Programs Unit, Translational Cancer Biology, University of Helsinki, Helsinki,  
14 Finland

15 <sup>6</sup>Department of Surgery, University of Helsinki and Helsinki University Hospital, Helsinki,  
16 Finland

17 <sup>7</sup>Department of Obstetrics and Gynaecology, University of Helsinki and Helsinki University  
18 Hospital, Helsinki, Finland

19 <sup>8</sup>Department of Mathematics and Statistics, University of Turku, Turku, Finland

20 <sup>9</sup>Molecular Therapeutics Program, Fox Chase Cancer Center, Philadelphia, PA, USA

21 <sup>10</sup>Department of Pathology and Applied Tumor Genomics Research Program, Faculty of  
22 Medicine, University of Helsinki

23 <sup>11</sup>HUS Diagnostic Center, HUSLAB, Helsinki University Hospital, Helsinki, Finland

24

25 Correspondence: [jukwes@utu.fi](mailto:jukwes@utu.fi)

26

27 The authors have declared that no conflict of interest exists.

28

29 **Abstract**

30

31

32 Identification of ovarian cancer (OvCa) patient subpopulations with increased sensitivity to  
33 targeted therapies could offer significant clinical benefit. We report that 22% of the high  
34 grade OvCa tumors at diagnosis express CIP2A oncoprotein at low levels. CIP2A<sup>low</sup> OvCa  
35 tumors have significantly lower likelihood of disease relapse after standard chemotherapy,  
36 but yet a portion of relapsed tumors retain their CIP2A<sup>low</sup> phenotype. We further discover  
37 that reactive oxygen species (ROS) inducing compound APR-246 (PRIMA-  
38 1Met/Eprenetapopt), currently in clinical development, preferentially kill CIP2A<sup>low</sup> OvCa cells  
39 across multiple chemotherapy resistant cell lines. Consistent with CIP2A<sup>low</sup> OvCa subtype  
40 in humans, CIP2A is dispensable for development of MISIIR-TAg-driven mouse OvCa  
41 tumors. Nevertheless, CIP2A deficient OvCa tumor cells from MISIIR-TAg mice displayed  
42 APR-246 hypersensitivity both *in vitro* and *in vivo*. Mechanistically, the lack of CIP2A  
43 expression hypersensitizes the OvCa cells to APR-246 by inhibition of NF-κB activity.  
44 Accordingly, combination of APR-246 and Nf-κB inhibitor compounds strongly synergized in  
45 killing of CIP2A positive OvCa cells. Collectively, we discover low CIP2A expression as a  
46 vulnerability for APR-246 in OvCa. The results warrant consideration of clinical testing of  
47 APR-246 for CIP2A<sup>low</sup> OvCa tumor subtype patients, and reveal CIP2A as a candidate APR-  
48 246 combination therapy target.

49

50

51

52

## 53 Introduction

54

55 Ovarian cancer is the fifth most common cause of cancer-related death among females in  
56 the United States. In the United States alone, every year more than 22, 000 women receive  
57 OvCa diagnosis, and around 14, 000 women die from this disease. Although most patients  
58 with primary OvCa respond well to standard adjuvant chemotherapy, the 5-year disease-  
59 specific overall survival in OvCa has been historically less than 50%, and during progression  
60 the disease becomes resistant to most current therapies (1). However, as evidenced by a  
61 significant clinical benefit of poly ADP ribose polymerase (PARP) inhibitors for platinum-  
62 sensitive OvCa patients, identification of new therapies for patient subpopulations with  
63 enhanced therapeutic response, might significantly change the disease outcome of those  
64 OvCa patients (2).

65

66 Tumor suppressive protein phosphatase 2A (PP2A) complexes control activities of number  
67 of oncogenic proteins and cancer driver pathways (3). In many cancer types, the tumor  
68 suppressor activity of PP2A is suppressed by its endogenous inhibitor protein CIP2A (4, 5).  
69 CIP2A has a restricted expression profile in most human and mouse normal tissues (5, 6),  
70 but it is overexpressed with high frequency in most human malignancies (4, 7). High CIP2A  
71 expression has been observed in 68-83% of high-grade serous OvCa tumors, and this  
72 associates with high proliferation index, aneuploidy, advanced tumor grade, *TP53* mutation,  
73 and EGFR expression (8, 9). On the other hand, the remaining 17-32% of OvCa patients  
74 with CIP2A<sup>low</sup> expressing tumors have significantly longer overall ovarian cancer-specific  
75 survival both in unselected patient population, as well as among patients treated with  
76 standard platinum-based chemotherapy (8). CIP2A was recently also shown in cell culture  
77 to protect OvCa cells from Cisplatin-induced apoptosis (10), and to associate with stemness

78 features in patient-derived high grade serous cancer (HGSC) cells (11). Further, in two  
79 cancer drug response screens, CIP2A depletion was shown to increase therapeutic  
80 response of HeLa and KRAS-mutant lung cancer cells to various types of cancer therapies  
81 (12, 13). Together, these results indicate that CIP2A<sup>low</sup> OvCa tumors, consisting of  
82 approximately 1/5 of all OvCa patients, may constitute a less aggressive, and more therapy  
83 sensitive OvCa subtype. The aim of this study was to identify clinically applicable  
84 compounds that would preferentially kill CIP2A<sup>low</sup> OvCa cells. Discovery of such compounds  
85 could potentially provide basis for predictive patient stratification strategy for OvCa patients  
86 with CIP2A<sup>low</sup> tumor subtype (2).

87

## 88 **Results and discussion**

89

### 90 **Screening for therapeutics that preferentially kill CIP2A<sup>low</sup> OvCa cells**

91

92 In a previously described retrospective cohort of 562 serous OvCa patients treated with  
93 standard chemotherapy (8), and for which both CIP2A status by immunohistochemistry  
94 (IHC), and relapse status was known, 266 patients achieved complete response (CR) after  
95 treatment with surgery and 6-8 rounds of paclitaxel-carboplatin combination. Among this  
96 group, 21,4% of tumors had negative CIP2A protein expression (Table S1). Notably,  
97 patients with CIP2A negative OvCa tumors at diagnosis significantly more often achieved  
98 complete response (CR) than patients with CIP2A positive tumors (57% vs. 45%, chi  
99 squared test p-value 0,044). OvCa tumor CIP2A negativity also very significantly predicted  
100 lower likelihood for disease relapse after chemotherapy (Table S1).

101

102 These results indicate that a portion of OvCa tumors develop in a CIP2A-independent  
103 manner. Results also support the earlier findings that CIP2A<sup>low</sup> tumors could constitute a  
104 more therapy sensitive subtype (10, 12, 13). To identify potential novel therapies for the  
105 CIP2A<sup>low</sup> OvCa subtype, we conducted a drug screen comparing cell viability effects of  
106 clinically used, or experimental drugs, between CIP2A<sup>high</sup> (control shRNA) and CIP2A<sup>low</sup>  
107 (CIP2A shRNA) HEY cells. Inhibition of CIP2A expression was confirmed by Western  
108 blotting (Fig. S1A). CIP2A<sup>high</sup> cells showed multi-drug resistance against chemotherapies  
109 commonly used for OvCa (Cisplatin, Doxorubicin, Olaparib, Paclitaxel,  
110 Topotecan)(Fig. 1A). However, CIP2A<sup>low</sup> HEY cells were at least to certain extent more  
111 sensitive to the majority of tested drugs at chosen concentrations (Fig. 1A). The most  
112 apparent sensitization effect was observed with APR-246 (PRIMA-1Met/Eprenetapopt) (14-  
113 18). Whereas, CIP2A<sup>high</sup> cells were practically insensitive to APR-246, CIP2A<sup>low</sup> HEY cells  
114 showed > 50% reduction in cell viability (Fig. 1A). APR-246 (Eprenetapopt) has been studied  
115 in clinical trial in OvCa (19), and it showed promising clinical activity in a recent phase II trial  
116 in acute myeloid leukemia (AML) (18).

117

118 To validate these results, and to understand the mode of cell killing by APR-246 in CIP2A<sup>low</sup>  
119 HEY cells, we screened nine of the drugs by using caspase3/7 apoptosis assay. HEY cells  
120 were resistant to 17-AAG, Cisplatin, Paclitaxel, and Dasatinib, regardless of their CIP2A  
121 status (Fig. 1B). On the other hand, Docetaxel, Doxorubicin, Gemcitabine, and UCN-01  
122 induced caspase3/7 activity in CIP2A<sup>high</sup> cells. Notably, APR-246 was the only drug that did  
123 not induce apoptosis in CIP2A<sup>high</sup> cells, but showed clearly higher apoptotic response in  
124 CIP2A<sup>low</sup> cells (Fig. 1B). Apoptosis induction in APR-246 treated CIP2A<sup>low</sup> cells was  
125 confirmed by COMET assay by using two independent shRNA sequences (Fig. S1A,B).

126

127 To confirm that vulnerability of CIP2A<sup>low</sup> cells to APR-246 was not restricted to HEY cells,  
128 we tested the impact of CIP2A for APR-246 response in HGSC cell line TYK-NU. In a cell  
129 viability assay, CIP2A<sup>low</sup> TYK-NU cells showed dramatically decreased EC50 values for  
130 APR-246 as compared to control shRNA expressing cells, and there was no difference  
131 between CIP2A<sup>low</sup> cells expressing two independent CIP2A shRNA sequences (Fig. 1C).  
132 Hypersensitivity of CIP2A<sup>low</sup> cells to APR-246 was also confirmed by colony growth assays  
133 in TYK-NU, and its cisplatin-resistant derivative TYK-NU.CPR cell line (Fig. 1D). To confirm  
134 that the effects were not related to clonal selection of shRNA transduced cells, and to  
135 expand the results to yet other OvCa cell lines, we transiently inhibited CIP2A expression  
136 by siRNA transfection in HEY, CAOv-3, NIH:OVCAR3, SKOV-3 and OVCAR-8 cells. In all  
137 cell lines CIP2A silencing resulted in increased sensitivity to APR-246 in a cell viability assay  
138 (Fig. S1C).

139

140 Although APR-246 was originally identified as a compound that reactivates mutant TP53  
141 (15, 16, 20), the tested OvCa cell lines displaying hypersensitivity to APR-246 upon CIP2A  
142 inhibition, exhibit varying *TP53* mutation statuses. Whereas HEY is *TP53* wild-type, and  
143 SKOV-3 has both *TP53* alleles deleted, the rest of the cells lines harbor distinct *TP53*  
144 mutations: TYK-NU (R175H); NIH:OVCAR3 (R248Q); CAOv-3 (Q136\*); and OVCAR8  
145 (Y126\_K132del; c.376-396del) (21) (<https://p53.iarc.fr>;  
146 <https://web.expasy.org/cellosaurus/>). Therefore, it is unlikely that the cell killing effects by  
147 APR-246 in the tested OvCa cells would be mediated solely by its mutant TP53 reactivating  
148 activity. On the other hand, several recent studies (using some of the same OvCa cells as  
149 here) have shown that APR-246 kills cancer cells independently of TP53, but via induction  
150 of reactive oxygen species (ROS) (16, 21, 22). Moreover, a recent study showed that MQ,  
151 the active product of APR-246 in cells, conjugates with GSH to disrupt the cellular

152 antioxidant balance (17). In a similar vein, we observed APR-246-elicited induction of ROS  
153 production in HEY cells, and this was completely quenched by pre-treatment of cells with  
154 anti-oxidant N-acetyl cysteine (NAC) (Fig. S1D). Strongly supporting ROS induction as a  
155 causative mechanism for APR-246-elicited cell killing of CIP2A<sup>low</sup> cells, NAC pre-treatment  
156 prevented the effects of APR-246 in cell viability (Fig. 1E). Of a note, the high micromolar  
157 concentrations of APR-246 required for OvCa cell killing is consistent with published studies  
158 (17, 21), and due to intracellular metabolism of the drug to the active product methylene  
159 quinuclidinone (MQ)(17). Further, experiments shown in figure 1A and 1B were performed  
160 with drug patch that apparently had lower bioactivity, and hence up to 100 uM concentrations  
161 had to be used, whereas the rest of the experiments were performed with APR-246 provided  
162 generously by APREA Therapeutics developing APR-246 (Eprenetapopt®) towards clinical  
163 cancer therapy.

164

165 Collectively, these results identify low CIP2A expression as a vulnerability to ARP-246  
166 across multiple chemotherapy resistant OvCa cell lines.

167

### 168 **Low CIP2A expression confers OvCa cell APR-246 hypersensitivity *in vivo***

169

170 *In vivo* relevance of CIP2A on OvCa cell APR-246 sensitivity was assessed by  
171 subcutaneous xenograft assay with stable shRNA transduced HEY cells. Consistent with  
172 resistance of CIP2A<sup>high</sup> cells to APR-246 *in vitro* (Fig. 1), tumor growth of CIP2A<sup>high</sup> cells *in*  
173 *vivo* was indistinguishable between vehicle (PBS) and APR-246 treated mice (Fig. 2A).  
174 Instead, APR-246 therapy significantly decreased tumor growth of CIP2A<sup>low</sup> cells (Fig. 2B).  
175 Notably, while CIP2A<sup>low</sup> cells were confirmed to have almost negligible CIP2A protein

176 expression upon transplantation (Fig. 2C), the xenograft tumors from control, or CIP2A<sup>low</sup>  
177 cells were indistinguishable for their CIP2A IHC positivity at the end of the *in vivo* therapy  
178 experiment (Fig. 2D). These results indicate that CIP2A positivity in the rare population of  
179 CIP2A<sup>low</sup> cells provided a strong selection advantage against APR-246 therapy.

180

181 To further assess the *in vivo* relevance of CIP2A for APR-246 therapy response, the  
182 heterozygous and homozygous CIP2A-deficient mice (CIP2A<sup>HEZ</sup> and CIP2A<sup>HOZ</sup>,  
183 respectively) (6) were crossed to MISIIR-TAg ovarian cancer mouse model (23). Consistent  
184 with human data that OvCa tumors may develop in CIP2A-independent manner (Table S1),  
185 we reported recently that there is no difference in OvCa tumorigenesis between MISIIR-TAg  
186 X CIP2A<sup>WT</sup> and MISIIR-TAg X CIP2A<sup>HOZ</sup> mice (24)(Fig. 2E). To address whether the CIP2A-  
187 deficient tumor cells from MISIIR-TAg mouse crosses yet exhibit APR-246 hypersensitivity,  
188 the OvCa cells from all three genotypes were isolated and cultured to retain their malignant  
189 characteristics as described previously (23). Fully consistent with human cell results, cells  
190 from MISIIR-TAg X CIP2A<sup>HOZ</sup> mice showed dramatic hypersensitivity to APR-246 both in  
191 cell viability and colony growth assays (Fig. 2F,G). Also, similar to human cells, APR-246-  
192 elicited cell killing of MISIIR-TAg X CIP2A<sup>HOZ</sup> cells was fully rescued by NAC pre-treatment  
193 (Fig. 2H).

194

195 Encouraged by these findings, we compared the *in vivo* APR-246 response of MISIIR-TAg  
196 OvCa tumors in both CIP2A genotypes by metabolic active tumor volume (MATV)  
197 measurement using PET/CT-imaging (Fig. 2I). After quantification, all but one MISIIR-TAg  
198 X CIP2A<sup>HOZ</sup> tumors showed hypersensitivity to APR-246 therapy, as compared to tumors  
199 from MISIIR-TAg X CIP2A<sup>WT</sup> mice (Fig. 2J). The average percentual change in tumor volume  
200 was significantly different between the genotypes (Fig. 2K). Finally, we did not observe any  
201 apparent genotype-specific differences in the weight of the mice or organs from the APR-  
202 246 treated mice, indicating that CIP2A deficiency does not result in critically limiting APR-  
203 246 hypersensitivity in the normal cells (Fig. S2A-D).

204



205 These results show that CIP2A<sup>low</sup> OvCa tumors are hypersensitive to APR-246 therapy *in*  
206 *vivo*. However, as all the existing data related to CIP2A status in human OvCa is from  
207 diagnostic samples (8-10), it is unclear whether CIP2A<sup>low</sup> tumors exist among the relapsed  
208 cases. Thereby, we surveyed CIP2A protein expression from a limited number (n=10) of  
209 available samples from HGSC OvCa ascites at disease relapse. Quantification of CIP2A  
210 protein levels demonstrated that there were clear differences between samples in CIP2A  
211 protein expression (Fig. S2E). Importantly, 4/10 of the relapsed HGSC samples (#5, #6, #8,  
212 and #10) could be clearly defined as CIP2A<sup>low</sup> as compared to the rest of the tumors (Fig.  
213 S2F). These results indicate that diagnostic identification of CIP2A<sup>low</sup> status in human  
214 recurrent OvCa tumors could have predictive potential for these patients regarding clinical  
215 responsiveness to APR-246 currently in clinical development (18, 19).

216

### 217 **Transcriptional profiling of APR-246 hypersensitive CIP2A<sup>low</sup> OvCa cells**

218

219 To understand the mechanistic basis of APR-246 hypersensitivity in CIP2A<sup>low</sup> OvCa cells,  
220 we conducted RNA-sequencing analysis between CIP2A<sup>high</sup> and CIP2A<sup>low</sup> HEY cells. The  
221 parental HEY cells were included in CIP2A<sup>high</sup> cohort to increase the statistical power of the  
222 gene signature enrichment analysis (GSEA), and to minimize risk that some transcriptional  
223 changes would be solely due to viral shRNA transduction. We identified 147 genes that were  
224 underexpressed, and 249 genes that were overexpressed, in CIP2A<sup>high</sup> as compared to  
225 CIP2A<sup>low</sup> cells (Fig. 3A, Log2 FC >1, p<0.05; Table S2). In the GSEA analysis, three  
226 transcriptional programs; Epithelial Mesenchymal Transition (EMT), TNFA signaling via NF-  
227 kB (NF-kB), and MYC targets, were significantly associated with differential gene expression  
228 profiles between CIP2A<sup>high</sup> and CIP2A<sup>low</sup> cells (Fig. 3B). The top ranking differentially  
229 expressed genes in these transcriptional programs are displayed in Figure 3C. Importantly,

230 all these gene expression programs are intimately linked to OvCa pathogenesis (25-27),  
231 and MYC regulation is a hallmark for CIP2A activity in cancer cells (5). On the other hand,  
232 the identified role for CIP2A in supporting NF- $\kappa$ B activity in OvCa cells is consistent with  
233 recent results from breast cancer cells (28).

234

### 235 **CIP2A targets NF- $\kappa$ B to confer APR-246 resistance**

236

237 Albeit changes in EMT, and MYC, can both contribute to drug resistance in CIP2A<sup>high</sup> cells,  
238 we focused our functional validation experiments to NF- $\kappa$ B signaling. This was due to direct  
239 links of NF- $\kappa$ B to apoptosis resistance in OvCa (27), and previous data that inhibition of NF-  
240  $\kappa$ B inhibits cellular glutathione levels thereby potentially sensitizing cells to ROS-inducing  
241 drugs such as APR-246 (29). To begin with, we validated CIP2A-elicited regulation of  
242 selected NF- $\kappa$ B target genes by Q-PCR (Fig. S3A,B). Further, CIP2A<sup>low</sup> HEY cells displayed  
243 significantly lower NF- $\kappa$ B-driven gene promoter activity (Fig. 4A). To directly assess CIP2A-  
244 mediated regulation of NF- $\kappa$ B, we analyzed nuclear translocation of phosphoregulated  
245 component of NF- $\kappa$ B complex, p65, between CIP2A<sup>high</sup> and CIP2A<sup>low</sup> HEY cells. CIP2A<sup>high</sup>  
246 cells had significantly higher proportion of nuclear p65 than CIP2A<sup>low</sup> cells in both control  
247 and TNF- $\alpha$  treated cells (Fig. 4B and S3C). These changes correlated with lower p65  
248 phosphorylation in TNF-treated CIP2A<sup>low</sup> cells (Fig. 4C,D). To dissect at which level of the  
249 NF- $\kappa$ B pathway CIP2A confers its effects, we studied NF- $\kappa$ B promoter activity in combination  
250 with overexpression of the p65 upstream kinase MEKK3 (30). MEKK3 overexpression  
251 strongly induced NF- $\kappa$ B promoter activity in CIP2A<sup>high</sup> cells, but this was blunted in CIP2A<sup>low</sup>  
252 cells (Fig. 4E; lane 3 vs. 4). However, CIP2A inhibition was able to blunt NF- $\kappa$ B activity also  
253 in cells overexpressing MEK mutant with non-phosphorylatable serine 250 and threonine  
254 516 (MEKK3<sup>S250D/T516D</sup>) (Fig. 4E; lane 7 vs. 8). These findings together with CIP2A effects

255 on p65 phosphorylation (Fig. 4C,D), support the conclusions that CIP2A promotes NF- $\kappa$ B  
256 activity downstream of activated MEKK3.

257

258 To address whether CIP2A-driven NF- $\kappa$ B activity functionally confers APR-246 resistance,  
259 we tested whether similar synergy that was observed between CIP2A inhibition and APR-  
260 246, could be recapitulated by co-treatment of CIP2A<sup>high</sup> cells with APR-246 and small  
261 molecule inhibitors of NF- $\kappa$ B. As a result, all three tested NF- $\kappa$ B inhibitors, each with different  
262 mode of action, potentiated the effects of APR-246 in inhibition of cell viability in CIP2A<sup>high</sup>  
263 HEY cells (Fig. 4F,G, S3D). These results were substantiated by colony growth assays  
264 including two independent CIP2A<sup>low</sup> HEY cell clones with different CIP2A shRNAs. With the  
265 chosen dose, NF- $\kappa$ B inhibitor PS-1145 did not have any notable effect on either CIP2A<sup>high</sup>  
266 or CIP2A<sup>low</sup> cells, but in combination with APR-246 it induced similar synthetic lethal  
267 phenotype that was observed with APR-246 in CIP2A<sup>low</sup> cells (Fig. 4H). Finally, the  
268 combined action of APR-246 and NF- $\kappa$ B inhibition was validated in patient-derived OvCa  
269 cell line OC002 derived from a patient with disseminated disease (Fig. 4I)(11). These results  
270 indicate that inhibition of NF- $\kappa$ B activity mediates APR-246 sensitivity in CIP2A<sup>low</sup> OvCa cells  
271 (Fig. 4J).

272

273

274 During relapse from chemotherapy, the OvCa cells have exhausted their capacity to respond  
275 to DNA-damaging agents (1), but might yet be vulnerable to other therapies in a subtype  
276 specific manner (2). Our results collectively identify CIP2A as a context-dependent  
277 oncoprotein in OvCa. It is dispensable for both human and mouse OvCa tumorigenesis, but  
278 associates with more aggressive disease (8)(Table S1), and drives resistance to APR-246  
279 therapy. Together with our analysis from a limited number of available human relapse  
280 samples, these data indicate that OvCa tumors with low CIP2A expression constitute a

281 minor, but yet clinically relevant novel human OvCa subtype. Combined with recently  
282 demonstrated role for CIP2A in confining therapy response for dozens of commonly used  
283 cancer drugs in other cancer cell types (12, 13), our results encourage further screening of  
284 CIP2A<sup>low</sup> OvCa cell models against larger drug libraries to identify, in addition to APR-246,  
285 other drugs to be tested for the treatment of CIP2A<sup>low</sup> OvCa subtype patients.

286

287 Current data indicate that APR-246 kills cancer cells via multiple mechanisms (16, 17, 20-  
288 22). Our data about ROS-dependent, but most likely TP53-independent mechanism of  
289 OvCa cell killing by APR-246 is directly supported by recently published work (17, 21). This  
290 is potentially clinically important finding as it indicates that *TP53* status would not dictate the  
291 cell killing activity of APR-246 in CIP2A<sup>low</sup> OvCa subtype tumors. APR-246 has been tested  
292 in two OvCa clinical trials (NCT02098343, NCT03268382) but no results are publicly  
293 available. Currently, APR-246 is studied in clinical trials in AML and myelodysplastic  
294 syndromes (18), and in various other solid cancer types (<https://www.clinicaltrials.gov>).  
295 Similar to OvCa, also among these cancer types there is a significant number of patients  
296 with CIP2A<sup>low</sup> subtype (4, 7). Therefore, and acknowledging the role of NF-κB activity in  
297 regulation of cellular buffering capacity against ROS (29), it would be very interesting to  
298 examine CIP2A expression and NF-κB pathway activity, from the clinical trial patient  
299 samples from these past and ongoing APR-246 trials. By these means the presented results  
300 could support future APR-246 clinical trials in better predicting the potential responders, and  
301 thus establish a future patient stratification strategy for clinical use of APR-246. In addition,  
302 our results position CIP2A as an APR-246 combination therapy target for ovarian cancer.

303

304 **Acknowledgements**

305

306 We are very grateful to APREA Therapeutics for APR-246 compound. Professor Caj  
307 Haglund, and Dr. Ralf Butzow are acknowledged for their contributions to the original CIP2A  
308 expression analysis from the OvCa cohort. This study used Turku Bioscience Centre core  
309 services by Finnish Functional Genomics Centre, and Cell Imaging and Cytometry, funded  
310 by University of Turku and Åbo Akademi University and Biocenter Finland. The work was  
311 funded by Sigrid Juselius Foundation (JW), Finnish Cancer Foundation (JW), Helsinki  
312 University Central Hospital Research Funds (AR) and Finska Läkaresällskapet (AR). Fox  
313 Chase Cancer Center (FCCC) Core Grant NCI P30 CA006927 (DCC) and generous  
314 donations from the Dubrow Fund and the Bucks County Board of Associates and the  
315 Mainline Board of Associates (DCC), and acknowledges the FCCC Laboratory Animal  
316 Facility for the husbandry and exportation of the TgMISIIR-TAg mice used in this study. TDL  
317 was funded as a FICAN Cancer Researcher for the Finnish Cancer Institute and by the  
318 Finnish Cultural Foundation.

319

320

321 **References**

322

- 323 1. Freimund AE, Beach JA, Christie EL, and Bowtell DDL. Mechanisms of Drug  
324 Resistance in High-Grade Serous Ovarian Cancer. *Hematol Oncol Clin North Am.*  
325 2018;32(6):983-96.
- 326 2. Kurnit KC, Fleming GF, and Lengyel E. Updates and New Options in Advanced  
327 Epithelial Ovarian Cancer Treatment. *Obstet Gynecol.* 2021;137(1):108-21.
- 328 3. Meeusen B, and Janssens V. Tumor suppressive protein phosphatases in human  
329 cancer: Emerging targets for therapeutic intervention and tumor stratification. *Int J*  
330 *Biochem Cell Biol.* 2018;96:98-134.
- 331 4. Soofiyan SR, Hejazi MS, and Baradaran B. The role of CIP2A in cancer: A review  
332 and update. *Biomed Pharmacother.* 2017;96:626-33.
- 333 5. Junttila MR, Puustinen P, Niemela M, Ahola R, Arnold H, Bottzauw T, et al. CIP2A  
334 inhibits PP2A in human malignancies. *Cell.* 2007;130(1):51-62.
- 335 6. Ventelä S, Côme C, Mäkelä JA, Hobbs RM, Mannermaa L, Kallajoki M, et al. CIP2A  
336 promotes proliferation of spermatogonial progenitor cells and spermatogenesis in  
337 mice. *PLoS ONE.* 2012;7(3):e33209.
- 338 7. Khanna A, and Pimanda JE. Clinical significance of Cancerous Inhibitor of Protein  
339 Phosphatase 2A (CIP2A) in human cancers. *Int J Cancer.* 2015.
- 340 8. Bockelman C, Lassus H, Hemmes A, Leminen A, Westermarck J, Haglund C, et al.  
341 Prognostic role of CIP2A expression in serous ovarian cancer. *British journal of*  
342 *cancer.* 2011;105(7):989-95.
- 343 9. Fang Y, Li Z, Wang X, and Zhang S. CIP2A is overexpressed in human ovarian  
344 cancer and regulates cell proliferation and apoptosis. *Tumour biology : the journal of*

- 345            *the International Society for Oncodevelopmental Biology and Medicine.*  
346            2012;33(6):2299-306.
- 347 10.    Li W, Zhang H, Yang L, and Wang Y. Cancerous inhibitor of protein phosphatase 2A  
348            regulates cisplatin resistance in ovarian cancer. *Oncology letters.* 2019;17(1):1211-  
349            6.
- 350 11.    Kaipio K, Chen P, Roering P, Huhtinen K, Mikkonen P, Ostling P, et al. ALDH1A1-  
351            related stemness in high-grade serous ovarian cancer is a negative prognostic  
352            indicator but potentially targetable by EGFR/mTOR-PI3K/aurora kinase inhibitors. *J*  
353            *Pathol.* 2020;250(2):159-69.
- 354 12.    Kauko O, Imanishi SY, Kuleskiy E, Yetukuri L, Laajala TD, Sharma M, et al.  
355            Phosphoproteome and drug-response effects mediated by the three protein  
356            phosphatase 2A inhibitor proteins CIP2A, SET, and PME-1. *J Biol Chem.*  
357            2020;295(13):4194-211.
- 358 13.    Kauko O, O'Connor CM, Kuleskiy E, Sangodkar J, Aakula A, Izadmehr S, et al.  
359            PP2A inhibition is a druggable MEK inhibitor resistance mechanism in KRAS-mutant  
360            lung cancer cells. *Science translational medicine.* 2018;10(450).
- 361 14.    Fransson A, Glaessgen D, Alfredsson J, Wiman KG, Bajalica-Lagercrantz S, and  
362            Mohell N. Strong synergy with APR-246 and DNA-damaging drugs in primary cancer  
363            cells from patients with TP53 mutant High-Grade Serous ovarian cancer. *J Ovarian*  
364            *Res.* 2016;9(1):27.
- 365 15.    Bykov VJ, Zache N, Stridh H, Westman J, Bergman J, Selivanova G, et al. PRIMA-  
366            1(MET) synergizes with cisplatin to induce tumor cell apoptosis. *Oncogene.*  
367            2005;24(21):3484-91.
- 368 16.    Perdrix A, Najem A, Saussez S, Awada A, Journe F, Ghanem G, et al. PRIMA-1 and  
369            PRIMA-1(Met) (APR-246): From Mutant/Wild Type p53 Reactivation to Unexpected

- 370 Mechanisms Underlying Their Potent Anti-Tumor Effect in Combinatorial Therapies.  
371 *Cancers (Basel)*. 2017;9(12).
- 372 17. Ceder S, Eriksson SE, Cheteh EH, Dawar S, Corrales Benitez M, Bykov VJN, et al.  
373 A thiol-bound drug reservoir enhances APR-246-induced mutant p53 tumor cell  
374 death. *EMBO molecular medicine*. 2021;13(2):e10852.
- 375 18. Cluzeau T, Sebert M, Rahme R, Cuzzubbo S, Lehmann-Che J, Madelaine I, et al.  
376 Eprenetapopt Plus Azacitidine in TP53-Mutated Myelodysplastic Syndromes and  
377 Acute Myeloid Leukemia: A Phase II Study by the Groupe Francophone des  
378 Myelodysplasies (GFM). *J Clin Oncol*. 2021:JCO2002342.
- 379 19. Basu B, Gourley C, Gabra H, Vergote IB, Brenton JD, Abrahmsen L, et al. PISARRO:  
380 A EUTROC phase 1b study of APR-246 with carboplatin (C) and pegylated liposomal  
381 doxorubicin (PLD) in relapsed platinum-sensitive high grade serous ovarian cancer  
382 (HGSOC). *Annals of Oncology*. 2016;27.
- 383 20. Lambert JM, Gorzov P, Veprintsev DB, Soderqvist M, Segerback D, Bergman J, et  
384 al. PRIMA-1 reactivates mutant p53 by covalent binding to the core domain. *Cancer*  
385 *Cell*. 2009;15(5):376-88.
- 386 21. Yoshikawa N, Kajiyama H, Nakamura K, Utsumi F, Niimi K, Mitsui H, et al. PRIMA-  
387 1MET induces apoptosis through accumulation of intracellular reactive oxygen  
388 species irrespective of p53 status and chemo-sensitivity in epithelial ovarian cancer  
389 cells. *Oncology reports*. 2016;35(5):2543-52.
- 390 22. Tessoulin B, Descamps G, Dousset C, Amiot M, and Pellat-Deceunynck C. Targeting  
391 Oxidative Stress With Auranofin or Prima-1(Met) to Circumvent p53 or Bax/Bak  
392 Deficiency in Myeloma Cells. *Frontiers in oncology*. 2019;9:128.



- 393 23. Connolly DC, Bao R, Nikitin AY, Stephens KC, Poole TW, Hua X, et al. Female mice  
394 chimeric for expression of the simian virus 40 TAg under control of the MISIIR  
395 promoter develop epithelial ovarian cancer. *Cancer Res.* 2003;63(6):1389-97.
- 396 24. Laine A, Nagelli SG, Farrington C, Butt U, Cvrljevic AN, Vainonen JP, et al. CIP2A  
397 interacts with TopBP1 and is selectively essential for DNA damage-induced basal-  
398 like breast cancer tumorigenesis. *bioRxiv.* 2020:2020.08.27.269902.
- 399 25. Zeng M, Kwiatkowski NP, Zhang T, Nabet B, Xu M, Liang Y, et al. Targeting MYC  
400 dependency in ovarian cancer through inhibition of CDK7 and CDK12/13. *Elife.*  
401 2018;7.
- 402 26. Loret N, Denys H, Tumeurs P, and Berx G. The Role of Epithelial-to-Mesenchymal  
403 Plasticity in Ovarian Cancer Progression and Therapy Resistance. *Cancers (Basel).*  
404 2019;11(6).
- 405 27. Momeny M, Yousefi H, Eyvani H, Moghaddaskho F, Salehi A, Esmaeili F, et al.  
406 Blockade of nuclear factor-kappaB (NF-kappaB) pathway inhibits growth and induces  
407 apoptosis in chemoresistant ovarian carcinoma cells. *Int J Biochem Cell Biol.*  
408 2018;99:1-9.
- 409 28. Guo B, Wu S, Zhu X, Zhang L, Deng J, Li F, et al. Micropeptide CIP2A-BP encoded  
410 by LINC00665 inhibits triple-negative breast cancer progression. *EMBO J.*  
411 2020;39(1):e102190.
- 412 29. Meng Q, Peng Z, Chen L, Si J, Dong Z, and Xia Y. Nuclear Factor-kappaB modulates  
413 cellular glutathione and prevents oxidative stress in cancer cells. *Cancer Lett.*  
414 2010;299(1):45-53.
- 415 30. Blonska M, You Y, Geleziunas R, and Lin X. Restoration of NF-kappaB activation by  
416 tumor necrosis factor alpha receptor complex-targeted MEKK3 in receptor-interacting  
417 protein-deficient cells. *Mol Cell Biol.* 2004;24(24):10757-65.

418

## 419 **Figure legends**

420

### 421 **Figure 1 Identification of APR-246 hypersensitivity in CIP2A<sup>low</sup> ovarian cancer cells**

422 **A)** Relative cell viability of HEY cells stably transduced either by control shRNA (HEY-  
423 CIP2A<sup>high</sup>) or by CIP2A targeted shRNA (HEY-CIP2A<sup>low</sup>) treated with indicated cancer  
424 therapeutics for 24 hours. Shown is mean + S.D. from parallel samples from representative  
425 screen. **B)** Relative caspase 3/7 activity in HEY-CIP2A<sup>high</sup> or HEY-CIP2A<sup>low</sup> cells treated with  
426 indicated cancer therapeutics for 48 hours. Shown is mean + S.D. of parallel samples from  
427 representative screen. **C)** Relative cell viability of TYK-NU cells stably transduced either by  
428 control shRNA (TYK-NU-CIP2A<sup>high</sup>) or by two CIP2A targeted shRNAs (TYK-NU-  
429 CIP2A<sup>low1,2</sup>) treated with increasing concentrations of APR-246 for 48 hours. Shown is mean  
430 + S.D. of parallel samples from representative screen. EC50: half maximal effective  
431 concentration. **D)** Colony growth assay of TYK-NU-CIP2A<sup>high</sup> and TYK-NU-CIP2A<sup>low1,2</sup> cells  
432 and their cisplatin resistant derivatives (TYK-NU-CPR) treated with indicated doses of APR-  
433 246. **E)** Relative cell viability of HEY-CIP2A<sup>high</sup> or HEY-CIP2A<sup>low</sup> cells treated with either  
434 APR-246 (20  $\mu$ M) alone or in combination with N-acetyl cysteine (NAC)(5 mM) for 48 hours.  
435 Shown is mean + S.D. of parallel samples from representative experiment.  $p < 0.001$ .

436

### 437 **Figure 2 Low CIP2A expression confers OvCa cell APR-246 hypersensitivity *in vivo***

438 **(A,B)** Anti-tumor efficacy of APR-246 in HEY-CIP2A<sup>high</sup> or HEY-CIP2A<sup>low</sup> cell xenografts.  
439 Cells were injected subcutaneously in the immunocompromised mice and APR-246  
440 treatment (5 days per week) was started after the average tumor size reached 100mm<sup>3</sup>.  
441 Shown is average tumor size from 5 mice in the group +/- S.D. \*  $p < 0.05$ , t-test. **(C)** Western  
442 blot analysis of CIP2A expression levels from HEY-CIP2A<sup>high</sup> or HEY-CIP2A<sup>low</sup> cells before  
443 inoculation as xenografts. **(D)** CIP2A Immunohistochemistry analyses of representative end-

444 point APR-246 treated xenograft tumors from A and B. **(E)** Representative ovarian tumors  
445 from mice with indicated genotypes. **(F&G)** APR-246 *ex vivo* sensitivity of primary TgMISIIR-  
446 Tag murOVCAR cell lines with indicated CIP2A genotypes (combined data; n= 6 cell lines  
447 (WT & HEZ) & 4 cell lines (HOZ)). **(H)** Pre-treatment of TgMISIIR-Tag murOVCAR cells with  
448 ROS scavenger NAC rescues CIP2A<sup>LOW</sup>(HOZ) murOVCAR cells from APR-246 induced cell  
449 death. 10  $\mu$ M APR-246. **(I)** PET/CT images of mice bearing TgMISIIR-Tag X CIP2A WT  
450 (upper panel) and TgMISIIR-Tag X HOZ (lower panel) tumors before and after treatment  
451 with APR-246 (100 mg/kg for 2 weeks (5 days per week)). 20-min long scans were  
452 performed 120 min post-injection of 5 MBq [18F]FDG (i.v). Tumors are highlighted with red  
453 circles. **(J)** Percentual change in metabolic active tumor volumes (MATV) between mice  
454 scanned before APR-246 treatment and two days after the last drug injection. **(K)** Average  
455 percentual change in tumor volume in response to APR-246 therapy in mice with indicated  
456 genotypes. \*  $p < 0.05$ , t-test.

457

### 458 **Figure 3 CIP2A-dependent gene expression profiles in HEY cells**

459 **(A)** Volcano blot analysis of differentially expressed genes between HEY-CIP2A<sup>high</sup> and  
460 HEY-CIP2A<sup>low</sup> cells. Each dot represents one gene. Green and red dots represent  
461 significantly ( $\text{Log}_2 < -1$  or  $< 1$ ;  $p < 0.05$ ) repressed and increased genes, respectively, in HEY-  
462 CIP2A<sup>high</sup> versus HEY-CIP2A<sup>low</sup> cells. **(B)** Gene Set Enrichment Analysis (GSEA) analysis  
463 of differentially expressed genes between CIP2A<sup>high</sup> (includes both parental and control  
464 shRNA cells) and CIP2A<sup>low</sup> HEY cells. **(C)** Heatmap presentation of the top ranking  
465 differentially expressed genes from the GSEA profiles shown in (B).

### 466 **Figure 4 CIP2A promotes NF- $\kappa$ B activity in APR-246 insensitive OvCa cells**

467 **(A)** Relative NF-kB luciferase reporter activity in HEY-CIP2A<sup>high</sup> and HEY-CIP2A<sup>low</sup> cells.  
468 Shown is mean + S.E.M. \* p<0.05, Mann-Whitney test. **(B)** Quantification of p65 signal  
469 intensity ratio (Nuclear/Cytoplasm) in HEY-CIP2A<sup>high</sup> or HEY-CIP2A<sup>low</sup> cells with or without  
470 TNF-alpha treatment. Shown is mean + S.E.M. \*\*\* p<0.001, Mann whitney test. **(C)**  
471 Western blot analysis of phospho-P65 and total p65 from TNF-alpha treated HEY-CIP2A<sup>high</sup>  
472 or HEY-CIP2A<sup>low</sup> cells. **(D)** Quantification of relative p65 phosphorylation from (C). n=4. \*\*\*  
473 p<0.05, Mann-Whitney test. **(E)** Relative NF-kB luciferase reporter activity in HEY-CIP2A<sup>high</sup>  
474 or HEY-CIP2A<sup>low</sup> cells with either empty vector, MEKK3 WT, MEKK3 T516A/S250A, or  
475 MEKK3 T5163/S250D overexpression. Shown is mean + S.E.M. \*\*\* p<0.001, Mann whitney  
476 test. **(F,G)** Relative cell viability of HEY-CIP2A<sup>high</sup> treated with APR-246 alone, or with IKK  
477 inhibitors PS-1145 or BMS-345541 alone, and their combinations. \*\*\* p<0.001, t-test. **(H)**  
478 Colony Growth assay of HEY-CIP2A<sup>high</sup>, HEY-CIP2A<sup>low1</sup> and HEY-CIP2A<sup>low2</sup> treated with  
479 either vehicle, PS-1145 alone, APR-246 alone or PS-1145 + ARP-246. **(I)** Relative cell  
480 viability in patient-derived HGSC cell line OC002 treated with either APR-246 alone or BMS-  
481 345541 + APR-246. EC50 values for APR-246 in each condition are indicated next to  
482 concentration curve. **(J)** Schematic model of mechanistic basis of CIP2A-mediated APR-246  
483 resistance in OvCa cells. Grey colour denotes for situation where the target is inhibited.  
484  
485

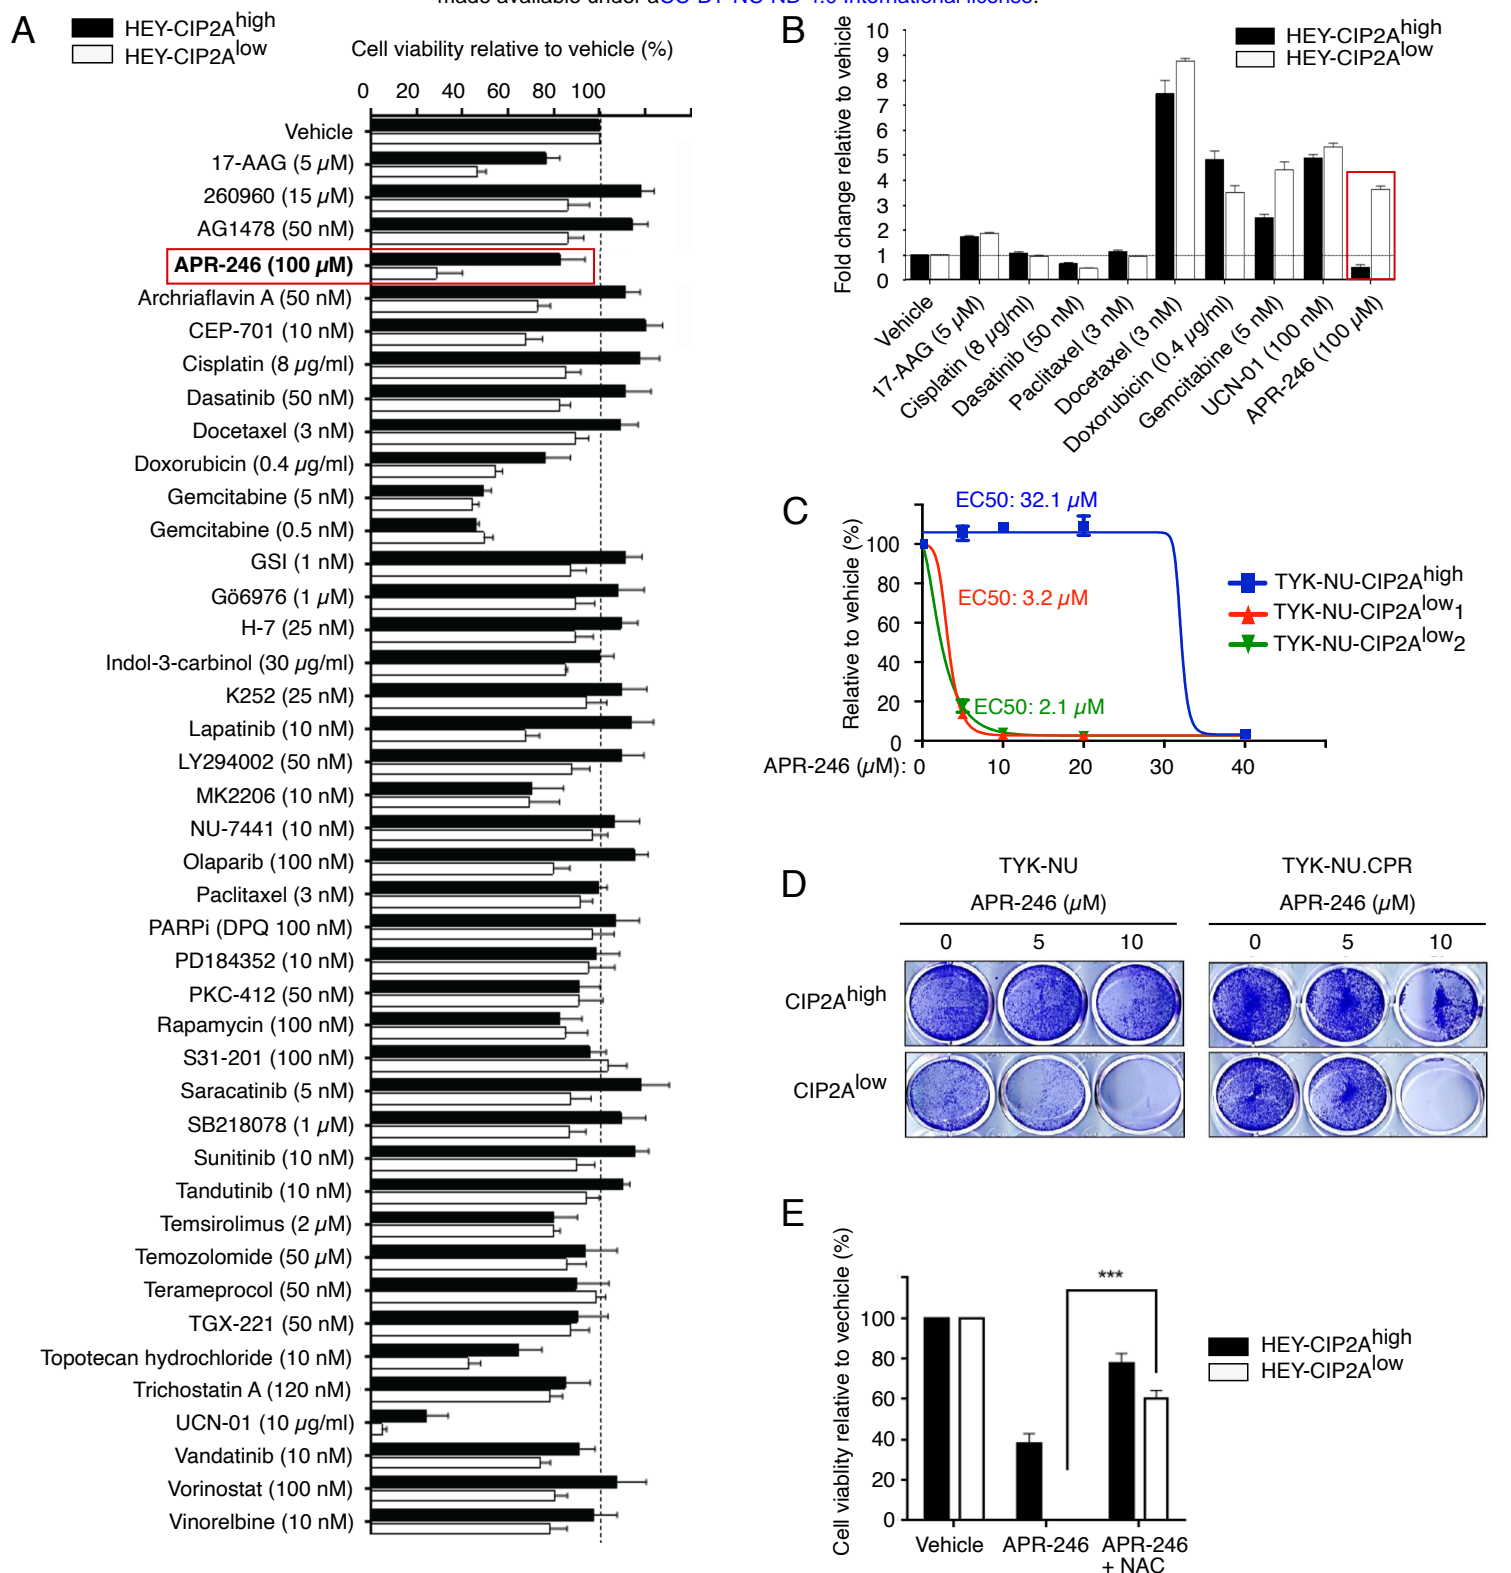

**Figure 1 Identification of APR-246 hypersensitivity in CIP2A<sup>low</sup> ovarian cancer cells (A)** Relative cell viability of HEY cells stably transduced either by control shRNA (HEY-CIP2A<sup>high</sup>) or by CIP2A targeted shRNA (HEY-CIP2A<sup>low</sup>) treated with indicated cancer therapeutics for 24 hours. Shown is mean + S.D. from parallel samples from representative screen. **(B)** Relative caspase 3/7 activity in HEY-CIP2A<sup>high</sup> or HEY-CIP2A<sup>low</sup> cells treated with indicated cancer therapeutics for 48 hours. Shown is mean + S.D. of parallel samples from representative screen. **(C)** Relative cell viability of TYK-NU cells stably transduced either by control shRNA (TYK-NU-CIP2A<sup>high</sup>) or by two CIP2A targeted shRNAs (TYK-NU-CIP2A<sup>low1,2</sup>) treated with increasing concentrations of APR-246 for 48 hours. Shown is mean + S.D. of parallel samples from representative screen. EC50: half maximal effective concentration. **(D)** Colony growth assay of TYK-NU-CIP2A<sup>high</sup> and TYK-NU-CIP2A<sup>low1,2</sup> cells and their cisplatin resistant derivatives (TYK-NU-CPR) treated with indicated doses of APR-246. **(E)** Relative cell viability of HEY-CIP2A<sup>high</sup> or HEY-CIP2A<sup>low</sup> cells treated with either APR-246 (20  $\mu$ M) alone or in combination with N-acetyl cysteine (NAC) (5 mM) for 48 hours. Shown is mean + S.D. of parallel samples from representative experiment.  $p \leq 0.001$ .

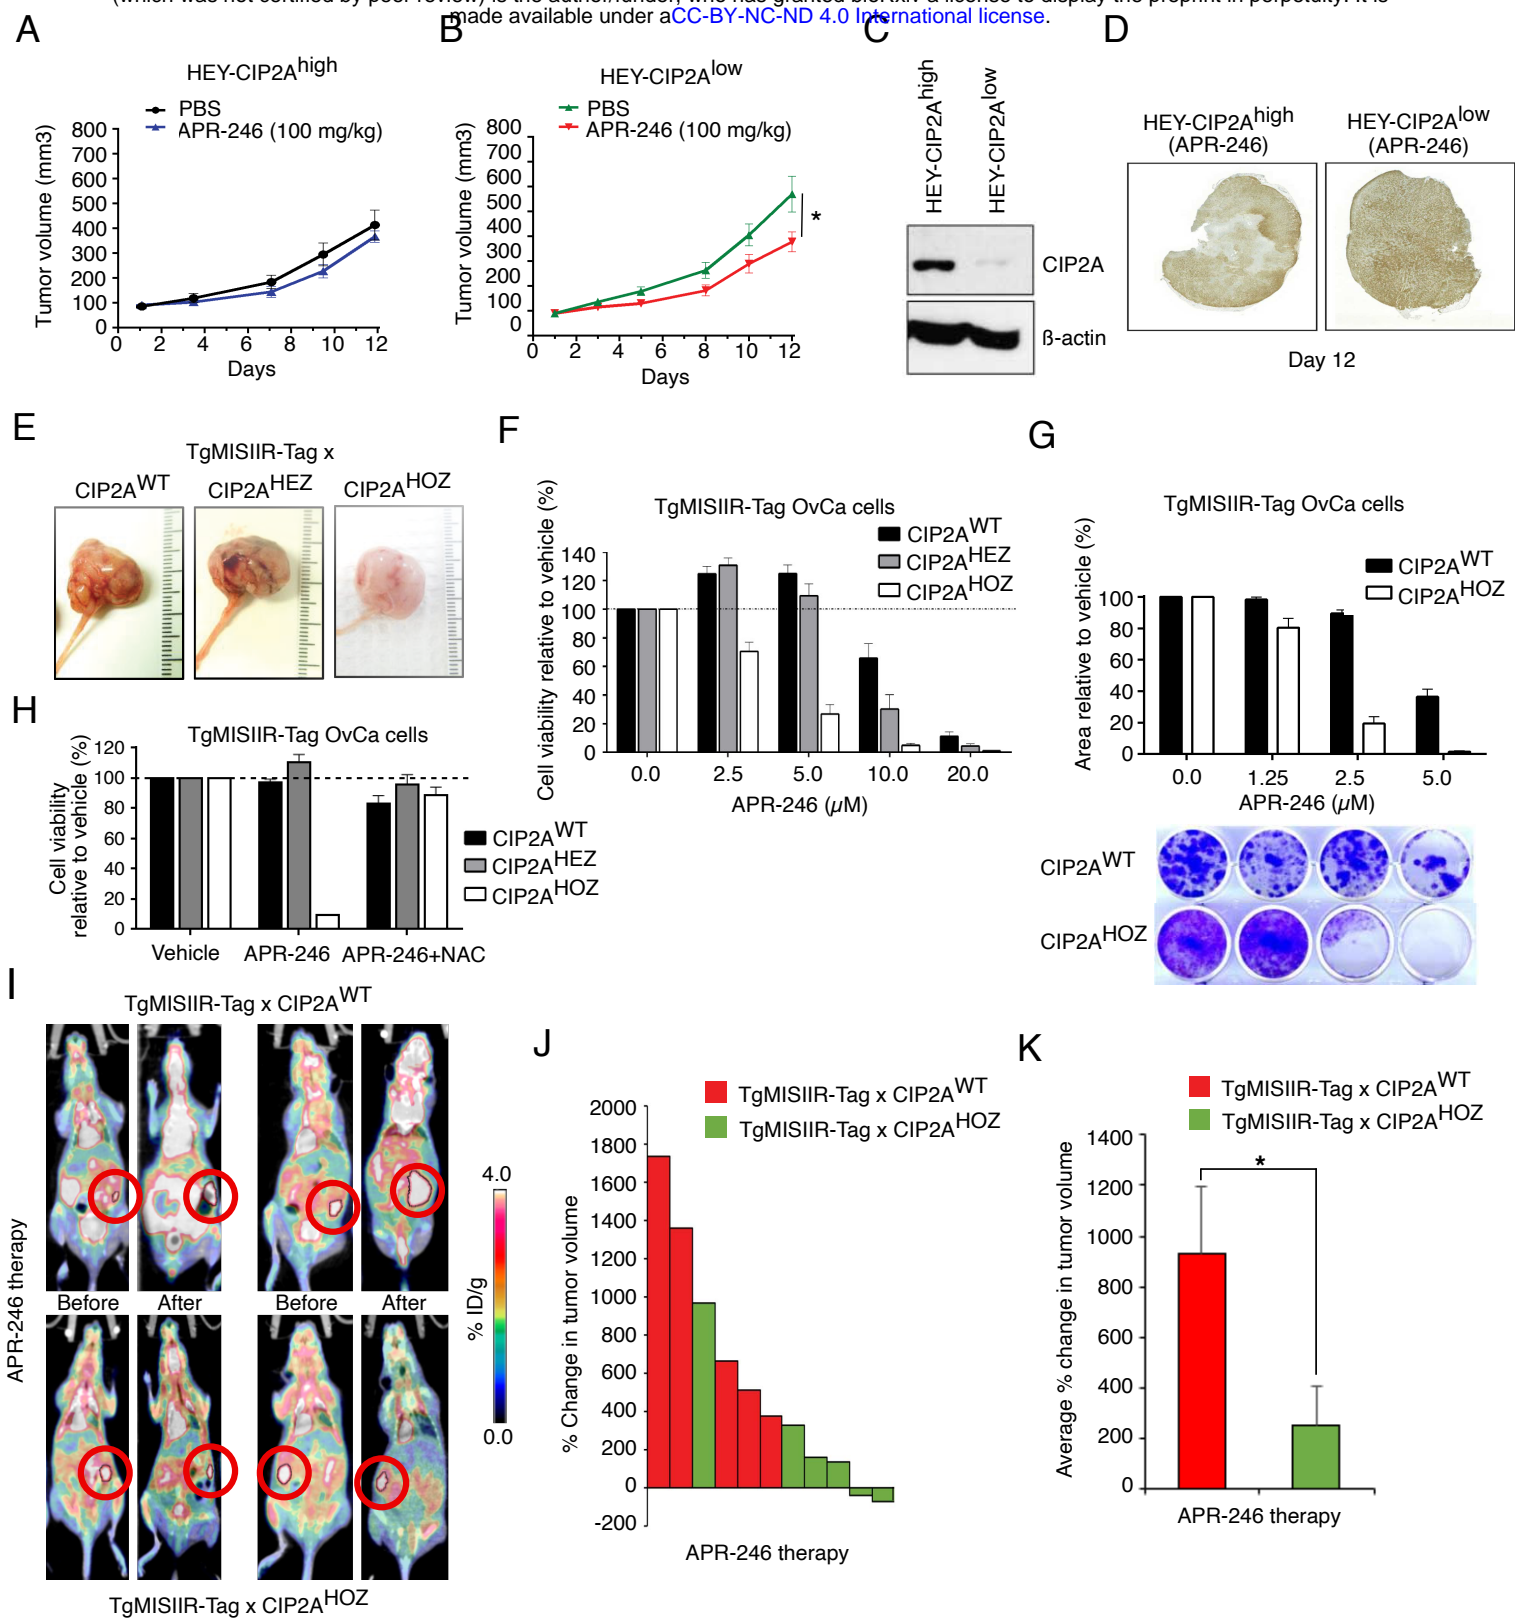

**Figure 2 Low CIP2A expression confers OvCa cell APR-246 hypersensitivity *in vivo* (A,B)** Anti-tumor efficacy of APR-246 in HEY-CIP2A<sup>high</sup> or HEY-CIP2A<sup>low</sup> cell xenografts. Cells were injected subcutaneously in the immunocompromised mice and APR-246 treatment (5 days per week) was started after the average tumor size reached 100mm<sup>3</sup>. Shown is average tumor size from 5 mice in the group +/- S.D. \*  $p < 0.05$ , t-test. **(C)** Western blot analysis of CIP2A expression levels from HEY-CIP2A<sup>high</sup> or HEY-CIP2A<sup>low</sup> cells before inoculation as xenografts. **(D)** CIP2A immunohistochemistry analyses of representative end-point APR-246 treated xenograft tumors from A and B. **(E)** Representative ovarian tumors from mice with indicated genotypes. **(F,G)** APR-246 *ex vivo* sensitivity of primary TgMISIIR-Tag murOVCA cell lines with indicated CIP2A genotypes (combined data; n= 6 cell lines (WT & HEZ) & 4 cell lines (HOZ)). **(H)** Pre-treatment of TgMISIIR-Tag murOVCA cells with ROS scavenger NAC rescues CIP2A<sup>low</sup>(HOZ) murOVCA cells from APR-246 induced cell death. 10 μM APR-246. **(I)** PET/CT images of mice bearing TgMISIIR-Tag X CIP2A WT (upper panel) and TgMISIIR-Tag X HOZ (lower panel) tumors before and after treatment with APR-246 (100 mg/kg for 2 weeks (5 days per week)). 20-min long scans were performed 120 min post-injection of 5 MBq [18F]FDG (i.v). Tumors are highlighted with red circles. **(J)** Percentual change in metabolic active tumor volumes (MATV) between mice scanned before APR-246 treatment and two days after the last drug injection. **(K)** Average percentual change in tumor volume in response to APR-246 therapy in mice with indicated genotypes. \*  $p < 0.05$ , t-test.

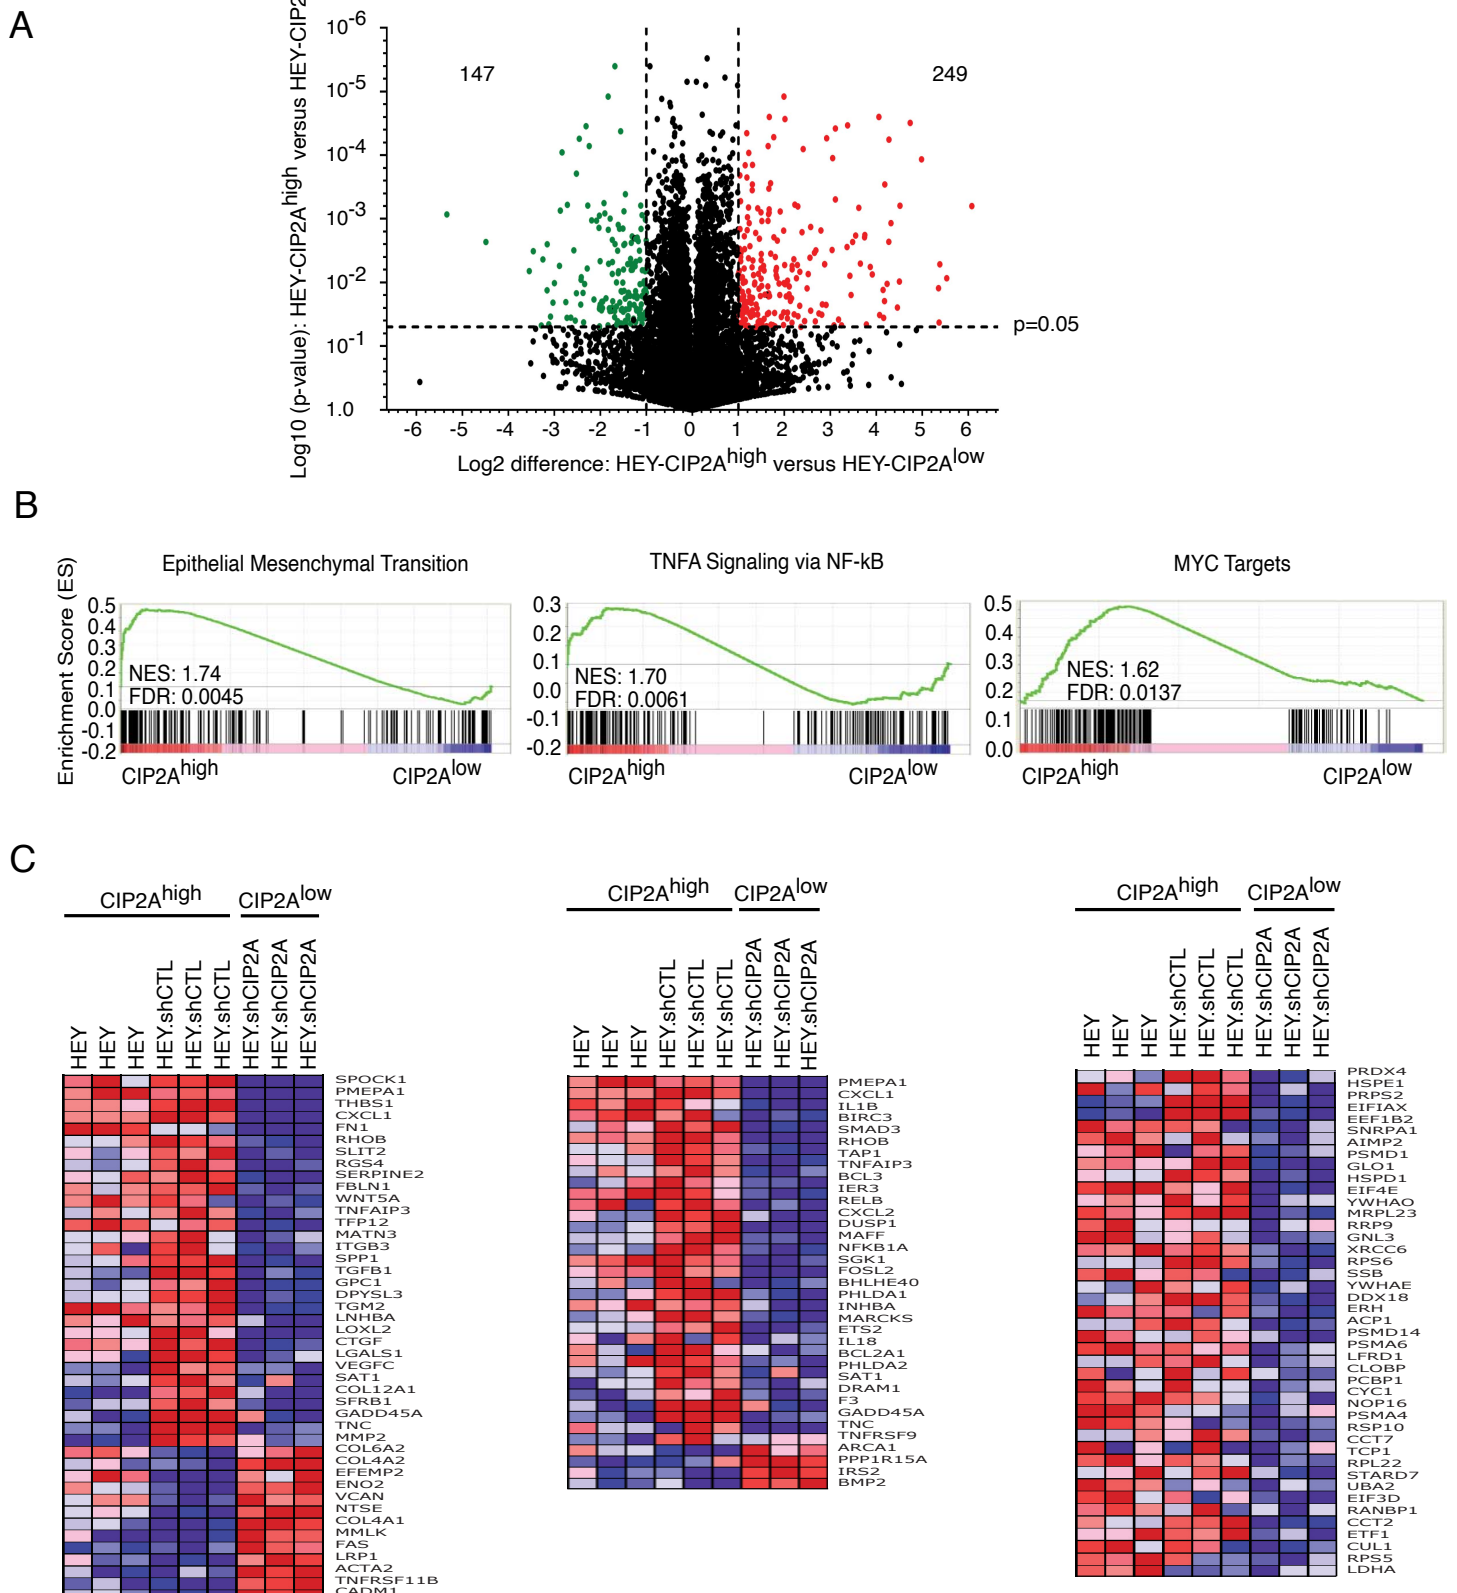

**Figure 3 CIP2A-dependent gene expression profiles in HEY cells (A)** Volcano blot analysis of differentially expressed genes between HEY-CIP2A<sup>high</sup> and HEY-CIP2A<sup>low</sup> cells. Each dot represents one gene. Green and red dots represent significantly ( $\text{Log}_2 < -1$  or  $< 1$ ;  $p \leq 0.05$ ) repressed ( $n=147$ ) and increased ( $n=249$ ) genes, respectively, in HEY-CIP2A<sup>high</sup> versus HEY-CIP2A<sup>low</sup> cells. **(B)** Gene Set Enrichment Analysis (GSEA) analysis of differentially expressed genes between CIP2A<sup>high</sup> (includes both parental and control shRNA cells) and CIP2A<sup>low</sup> HEY cells. **(C)** Heatmap presentation of the top ranking differentially expressed genes from the GSEA profiles shown in (B).

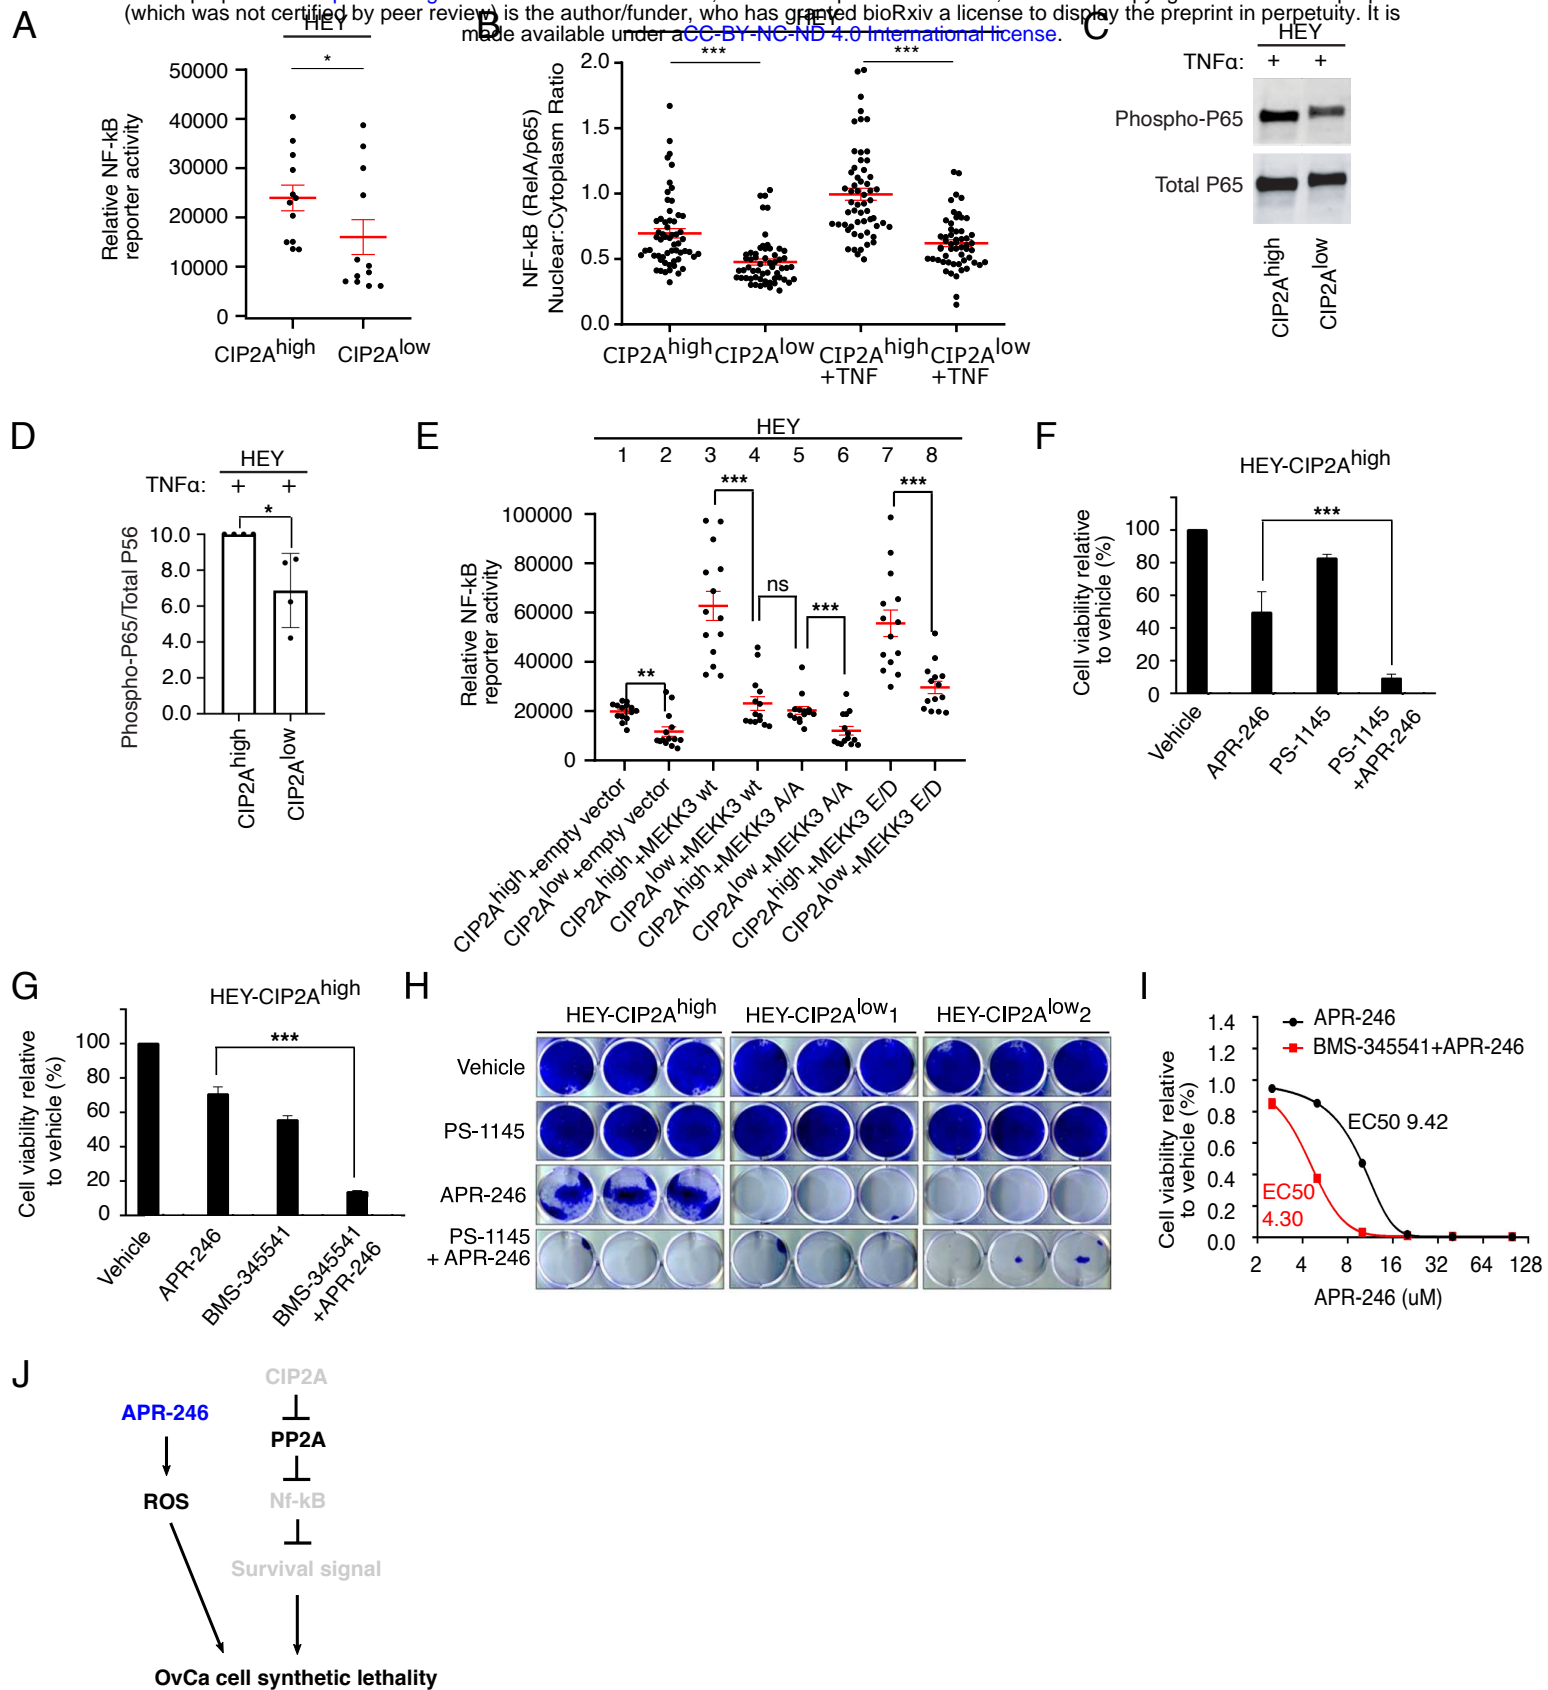

**Figure 4 CIP2A targets NF- $\kappa$ B to confer APR-246 resistance** (A) Relative NF- $\kappa$ B luciferase reporter activity in HEY-CIP2A<sup>high</sup> and HEY-CIP2A<sup>low</sup> cells. Shown is mean + S.E.M. \*\*\*  $p \leq 0.001$ , Mann-Whitney test. (B) Quantification of p65 signal intensity ratio (Nuclear/ Cytoplasm) in HEY-CIP2A<sup>high</sup> or HEY-CIP2A<sup>low</sup> cells with or without TNF-alpha treatment. Shown is mean + S.E.M. \*\*\*  $p \leq 0.001$ , Mann-Whitney test. (C) Western blot analysis of phospho-P65 and total p65 from TNF-alpha treated HEY-CIP2A<sup>high</sup> or HEY-CIP2A<sup>low</sup> cells. (D) Quantification of relative p65 phosphorylation from (C).  $n=4$ . \*\*\*  $p \leq 0.05$ , Mann-Whitney test. (E) Relative NF- $\kappa$ B luciferase reporter activity in HEY-CIP2A<sup>high</sup> or HEY-CIP2A<sup>low</sup> cells with either empty vector, MEKK3 WT, MEKK3 T516A/S250A, or MEKK3 T5163/S250D overexpression. Shown is mean + S.E.M. \*\*\*  $p \leq 0.001$ , Mann-Whitney test. (F,G) Relative cell viability of HEY-CIP2A<sup>high</sup> treated with APR-246 alone, or with IKK inhibitors PS-1145 or BMS-345541 alone, and their combinations. \*\*\*  $p \leq 0.001$ , t-test. (H) Colony growth assay of HEY-CIP2A<sup>high</sup>, HEY-CIP2A<sup>low1</sup> and HEY-CIP2A<sup>low2</sup> treated with either vehicle, PS-1145 alone, APR-246 alone or PS-1145 + APR-246. (I) Relative cell viability in patient-derived HGSC cell line OC002 treated with either APR-246 alone or BMS-345541 + APR-246. EC50 values for APR-246 in each conditions is indicated next to concentration curve. (J) Schematic model of mechanistic basis of CIP2A-mediated APR-246 resistance in OvCa cells. Grey colour denotes for situation where the target is inhibited.
